# Supplementary material for: Small Ribosomal Protein RPS0 Stimulates Translation Initiation by Mediating 40S-Binding of eIF3 via Its Direct Contact with the eIF3a/TIF32 Subunit
Source: PubMed Central journal article supplement (PMC3390373; doi:10.1371/journal.pone.0040464), 2012-07-05

**Figure S1. Growth cessation caused by the RPS0A-depletion under non-permissive conditions is fully reversible by high copy expression of the wt RPS0A allele expressed from its endogenous promoter.** Strain YID16 (*rps0a* $\Delta$  *rps0b* $\Delta$  YE $\rho$ MET-RPS0A-U) bearing the *RPPS0A* WT allele under control of *MET3* promoter was further transformed by YE $\rho$ RPS0A-L (bearing the wt *RPS0A* allele under control of its own promoter) and the resulting transformant was spotted in four serial 10-fold dilutions on SD medium +/- methionine and incubated at 30°C for 2.5 days.

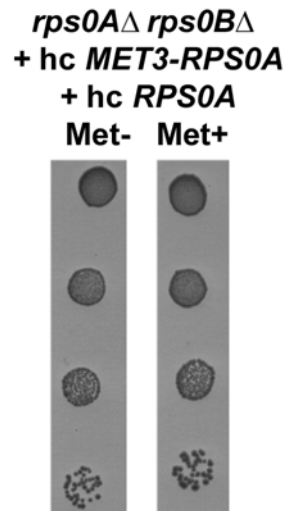

Supplement: pone.0040464.s001.pdf [file pone.0040464.s001.pdf]
